# Supplementary material
Source: Springer Nature journal article supplement (https://www.springermedizin.de/resource/supplementary/12978_2012_203_MOESM1_ESM.pdf/9602230)

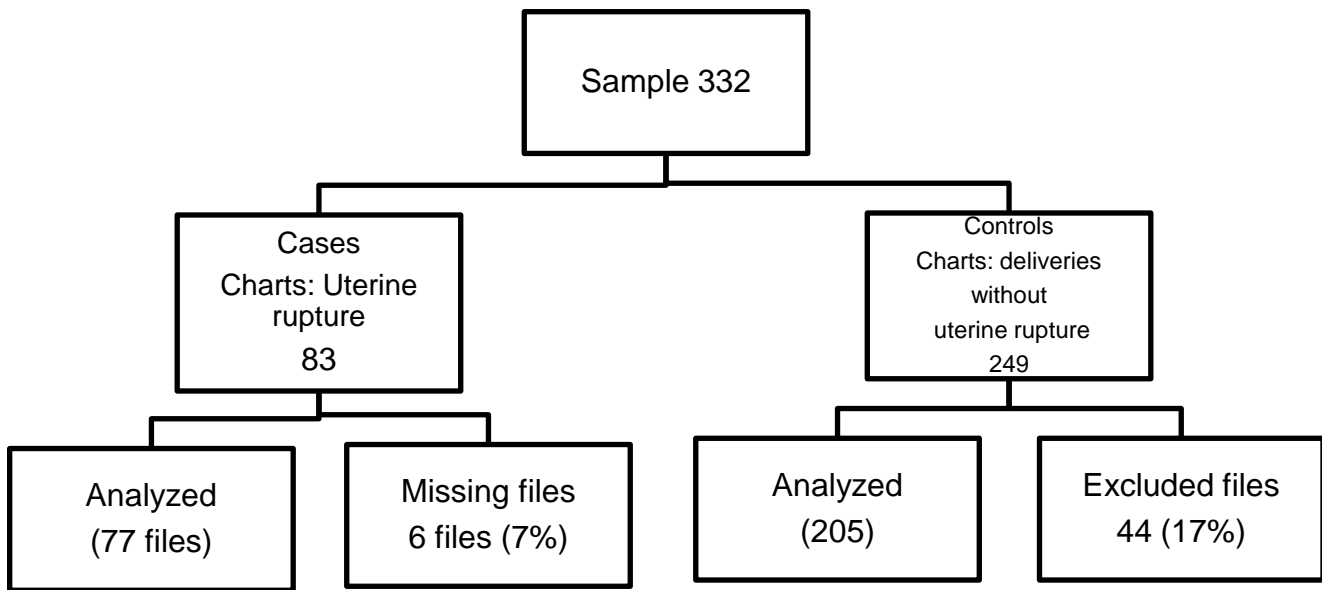

Supplement: MOESM1 [file 9602230]
